# Supplementary material
Source: Springer Nature journal article supplement (https://www.springermedizin.de/resource/supplementary/12889_2007_971_MOESM1_ESM.pdf/9502384)

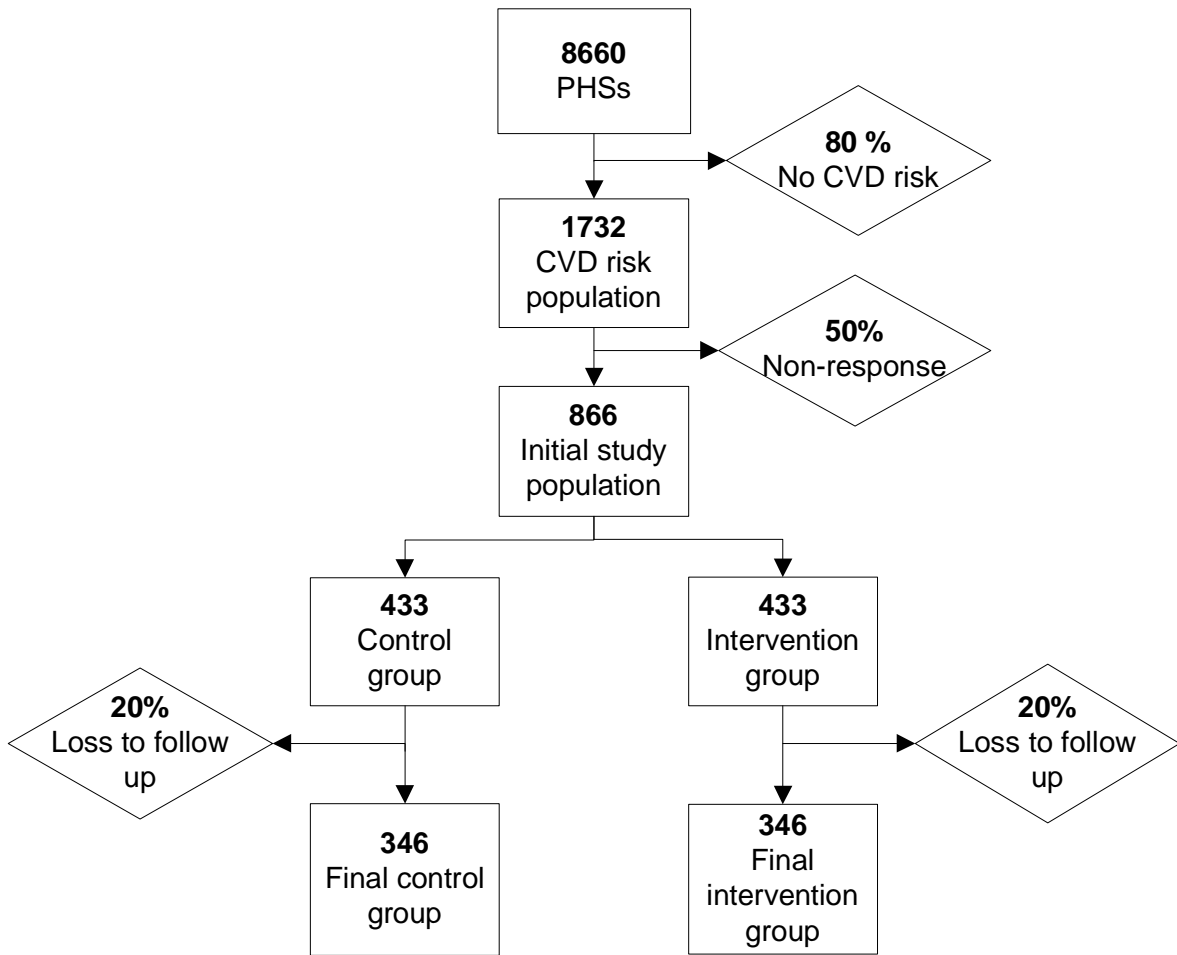

Supplement: MOESM1 [file 9502384]
